# Supplementary material for: A qualitative analysis of vaccine decision makers’ conceptualization and fostering of ‘community engagement’ in India
Source: Springer Nature journal article supplement (doi:10.1186/s12939-020-01290-5), 2020-10-20
Supplement: MOESM2 [file 18504220]

IJEH-D-20-00306R3

**A qualitative analysis of vaccine decision-makers' conceptualization and fostering of 'community engagement' in India**

**Supplement 2: Exhaustive list of Nodes Describing Conceptualization and Support for Community Engagement for Introduction and Uptake of New and Emerging Vaccines in India, 2018. (This paper mostly utilized codes 1-5)**

**Conceptualization of Community Engagement**

|                                                     |                                                                                                                                                                                                                                                                                      |
|-----------------------------------------------------|--------------------------------------------------------------------------------------------------------------------------------------------------------------------------------------------------------------------------------------------------------------------------------------|
| 1a. Egalitarian                                     | Perceiving communities as equal partners and leaders by vaccine policy makers.                                                                                                                                                                                                       |
| 1b. Evaluative definition of CE                     | Opinion based comment on virtue of community engagement leading to vaccination uptake.                                                                                                                                                                                               |
| 1c. Ideal normative definition examples of CE       | Ideal definition of what community engagement should be, irrespective of what the organization is doing or not doing. Defining ideal community engagement processes which will lead to community engagement (goal).                                                                  |
| 1d. Organizational interventions with or for CE     | The actual programmatic interventions with/at community levels by the organization for vaccination uptake.                                                                                                                                                                           |
| (i) Community empowering interventions              | Processes leading to empowered communities.                                                                                                                                                                                                                                          |
| (ii) Personal narratives                            | What the respondent did in her/his current or earlier position to engage the communities. Mostly use of first person                                                                                                                                                                 |
| (iii) Token interventions                           | Roger Hart's Ladder of Participation which defines this as the lowest level of community engagement.                                                                                                                                                                                 |
| (iv) Top-down interventions                         | Vertical program delivery and perception of community as beneficiaries, rather than equal stakeholders to vaccination program.                                                                                                                                                       |
| ▪ Communication and capacity building interventions | Inter Personal Communication (IPC), Information Education and Communication (IEC), Behavior Change Communication (BCC), mass-media messaging for sensitization and awareness and capacity building trainings of workers, peer educators, health care workers and local stakeholders. |
| ▪ Supply chain management                           | Ensuring supply of vaccines from the center to the ground levels.                                                                                                                                                                                                                    |
| (v) Transactional interventions                     | Dialogue with the community to build faith, trust and credibility for policymaker's/vaccine delivering system.                                                                                                                                                                       |
| (vi) Vaccination delivery by frontline HCWs         | Vaccination delivery by frontline healthcare workers (HCW) to vaccine eligible population.                                                                                                                                                                                           |

**Evolution of definition of Community Engagement**

|                                         |                                                                                                                                                                                                                                         |
|-----------------------------------------|-----------------------------------------------------------------------------------------------------------------------------------------------------------------------------------------------------------------------------------------|
| 2a. Comparing                           | Comparing different vaccine delivery/CE strategies across time or different vaccines, or comparing vaccination with other programs, urban and rural differences in delivery strategies and how things were/are done in other countries. |
| 2b. Evidence base scientific approach   | Learning from one vaccine experience, presence or lack of evidence/data/indicators of CE in the vaccine arena.                                                                                                                          |
| 2c. Institutional strategic orientation | Organizational learnings and strategic orientations and shifts over time, across different vaccines and on the issue of community engagement in the vaccine space.                                                                      |
| 2d. Opinion based                       | Ideal opinions, more of rhetoric questions if that would work.                                                                                                                                                                          |
| 2e. Personal narrative                  | How his/her own conceptualization/role to engage with communities has changed over the years, in this and earlier organizations.                                                                                                        |
| 2f. Transformative                      | Macro transformations based on the burden of disease, vaccine availability like progressive state (HPV in Punjab) etc. Policy makers' thoughts to initiate new methods/models/strategies.                                               |

**Support to promote Community Engagement**

|                                                        |                                                                                                                  |
|--------------------------------------------------------|------------------------------------------------------------------------------------------------------------------|
| 3a. Global stakeholders                                | Support/help/solidarity of global partners and donors.                                                           |
| 3b. Ideal or evidence of other regions or institutions | Support/help/solidarity of global partners and donors, or international collaborations of technical think tanks. |

|                                   |                                                                                                                                                                                        |
|-----------------------------------|----------------------------------------------------------------------------------------------------------------------------------------------------------------------------------------|
| 3c. National stakeholders         | Support/help/partnership/solidarity of national level organizations and national level vaccine ambassadors or advocates. Political will of the Ministry/Prime Minister/Chief Minister. |
| 3d. Respondent's own organization | Acknowledging enabling environment in the organization and support of the organizational head.                                                                                         |
| 3e. Self                          |                                                                                                                                                                                        |
| (i) Duty                          | Performing his/her duty.                                                                                                                                                               |
| (ii) Responsibility               | Self-motivated and performs beyond stipulated duty for innovative CE strategies.                                                                                                       |

#### Resources for Community Engagement in the Organization

|                         |                                                                                                                                                     |
|-------------------------|-----------------------------------------------------------------------------------------------------------------------------------------------------|
| 4a. Financial resources | Monetary resources within the organization which they have, or lack of finances.                                                                    |
| 4b. Human Resources     | Human resources within the organization, e.g. Community outreach capacity of the organization - which they have or lack and should ideally possess. |

#### Partnerships for Community Engagement

|                                                          |                                                                                                    |
|----------------------------------------------------------|----------------------------------------------------------------------------------------------------|
| 5a. With global entities                                 | Partnership with global organizations/and donors.                                                  |
| 5b. With national organizations/technical bodies         | Partnership with local organizations/technical body of the ministry/higher education institutions. |
| 5c. With local CBOs, CSOs, Youth Clubs, communities etc. | Partnership with local CBOs, CSOs, Youth Clubs, communities etc.                                   |
| 5d. Ideal partnerships at organizational level           | Ideal partnerships which would be helpful.                                                         |
| 5e. Organizational                                       | Existing partnerships of the organization/institution.                                             |

#### Community Level Enablers for Community Engagement

|                             |                                                                                                         |
|-----------------------------|---------------------------------------------------------------------------------------------------------|
| 6a. Local level influencers | Religious leaders, clubs, women's groups who influence positive vaccination decision among communities. |
| 6b. Disease outbreaks       | Certain outbreaks which compelled parents vaccinating their children.                                   |

#### Community Level Barriers for Community Engagement

|                                      |                                                                                                                                                                                      |
|--------------------------------------|--------------------------------------------------------------------------------------------------------------------------------------------------------------------------------------|
| 7a. Demand side barriers             |                                                                                                                                                                                      |
| (i) Access                           | Child sick or travelling or nobody at home to take the child to the vaccination site.                                                                                                |
| (ii) Blackmailing and strategizing   | Communities strategizing with Govt due to lack of trust – like ‘build the road then we will take the vaccines’ or ‘what must be the plot of the Govt. to vaccinate’ etc.             |
| (iii) Fear and reluctance            | Fear of illness or of death of child, fear of religious incompetence due to vaccination, arising from experience with this child, another child, neighbor’s child or media reports.  |
| (iv) Lack of information             | No knowledge about vaccines, no knowledge of vaccine schedules and lack of information about importance of the vaccines                                                              |
| (v) Myths and Rumors                 | Spreading of mis-information                                                                                                                                                         |
| (vi) Power structures in the society | Structural barriers related to class, caste, and gender, rural versus urban hindering reach of marginalized communities to getting vaccinated.                                       |
| 7b. Supply side barriers             |                                                                                                                                                                                      |
| (i) Access                           | Health care worker not present in the session site, vaccines not there, vaccines there but have crossed the due date, vaccines could not reach the under-reached/under-served areas. |
| (ii) Power structures in the society | Structural barriers like power relations between researcher and community in the society, hindering reach of marginalized communities to getting vaccinated.                         |
